# Supplementary material
Source: ML conference proceedings conference paper supplement (https://openreview.net/forum?id=f6AoMP75dy)

# Performance Comparison for HalfCheetah-v4

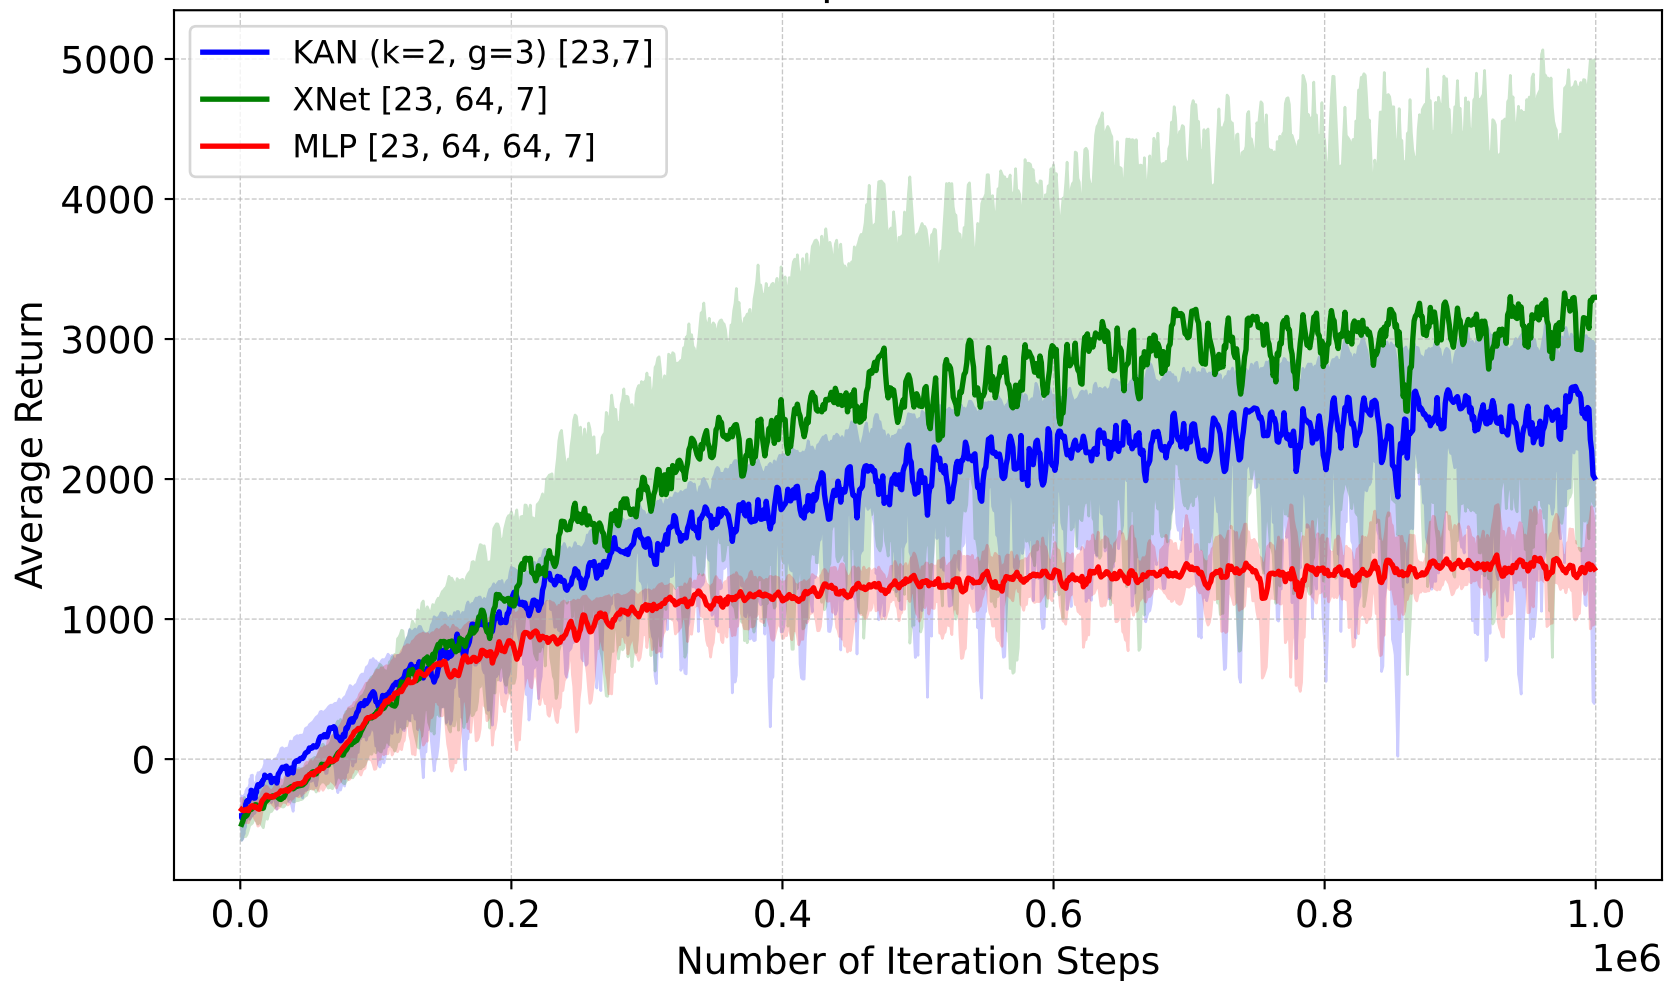

Supplement: supplementary_material [file Average_Return_HalfCheetah-v4.pdf › Code/Comparison-PPO-main/cleanrl/runs/plot/Average_Return_HalfCheetah-v4.pdf]

# Performance Comparison for Swimmer-v4

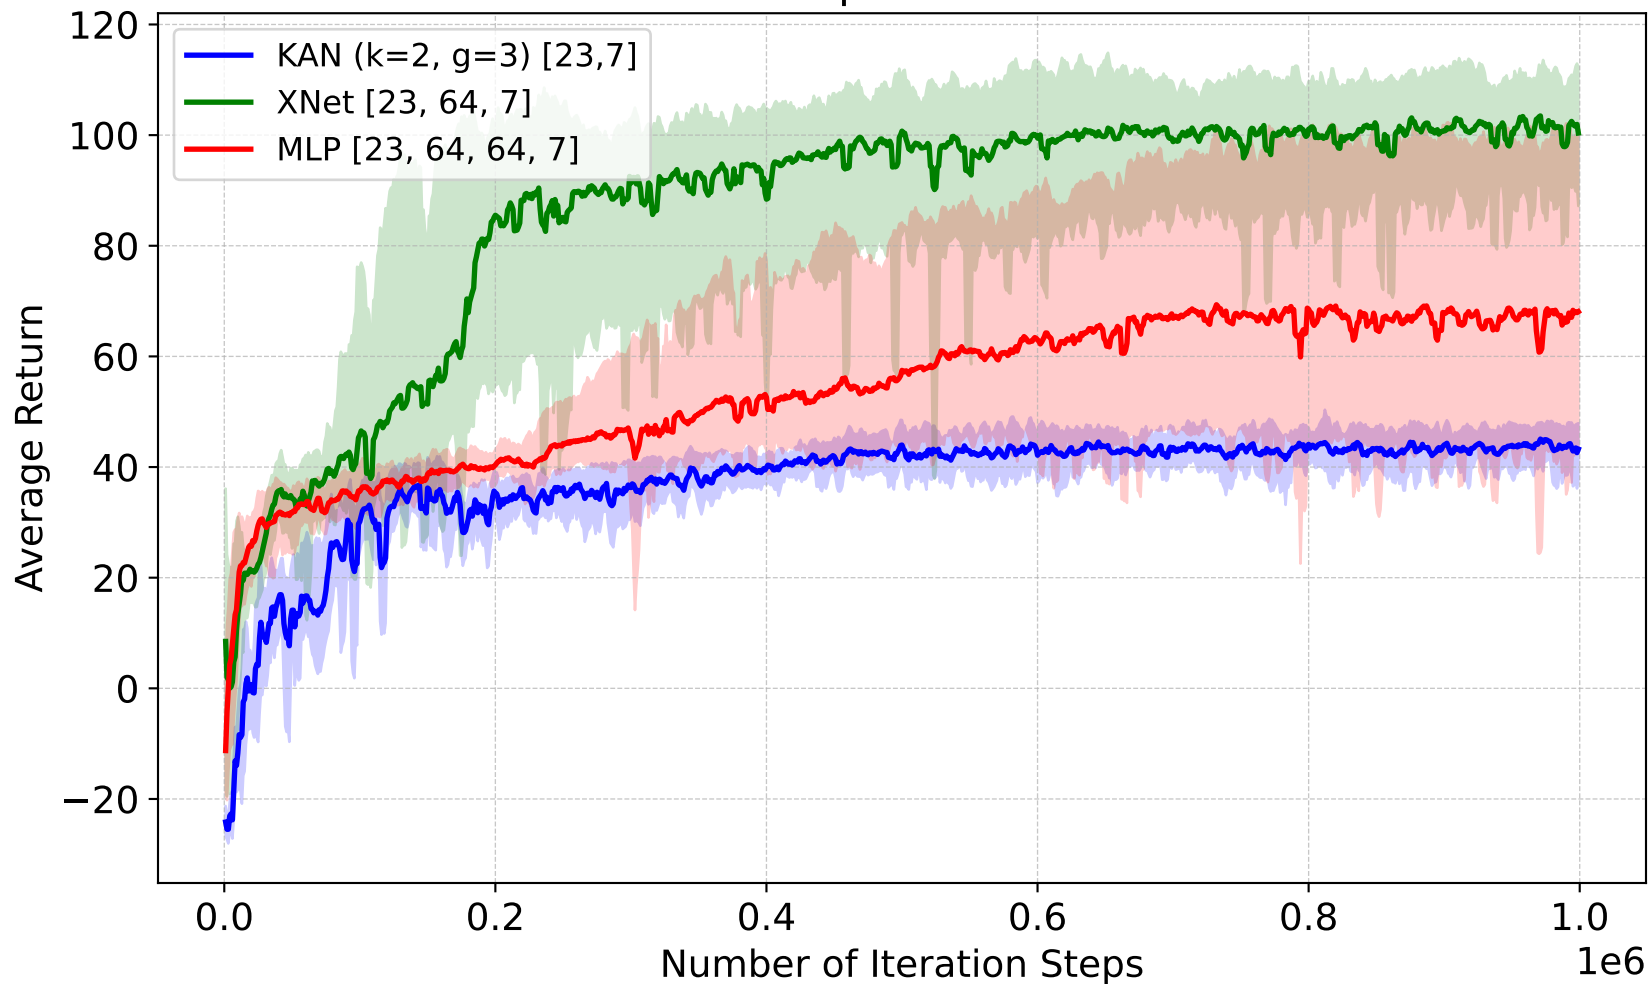

Supplement: supplementary_material [file Average_Return_Swimmer-v4.pdf › Code/Comparison-PPO-main/cleanrl/runs/plot/Average_Return_Swimmer-v4.pdf]
